# Supplementary material for: CO2–expanded ethanol chemical synthesis of a Fe3O4@graphene composite and its good electrochemical properties as anode material for Li-ion batteries
Source: Royal Society of Chemistry journal article supplement (doi:10.1039/c3ta01388j), 2013-01-01
Supplement: c3ta01388j.pdf [file c3ta01388j.pdf]

## Supporting Information for

# CO<sub>2</sub>-expanded ethanol chemical synthesis of a Fe<sub>3</sub>O<sub>4</sub>@graphene composite and its high electrochemical properties as anode material for Li-ion batteries

Linhai Zhuo,<sup>a,c</sup> Yingqiang Wu,<sup>a,c,d</sup> Lingyan Wang,<sup>a,c,d</sup> Jun Ming,<sup>a,c,d</sup> Yancun Yu,<sup>a,c</sup> Xinbo Zhang,<sup>\*b</sup> Fengyu Zhao<sup>\*a,c</sup>

<sup>a</sup> State Key Laboratory of Electroanalytical Chemistry, Changchun Institute of Applied Chemistry, Chinese Academy of Sciences, Changchun 130022, China

<sup>b</sup> State Key Laboratory of Rare Earth Resource Utilizations, Changchun Institute of Applied Chemistry, Chinese Academy of Sciences, Changchun 130022, China E-mail: xbzhang@ciac.jl.cn

<sup>c</sup> Laboratory of Green Chemistry and Process, Changchun Institute of Applied Chemistry, Chinese Academy of Sciences, Changchun 130022, China E-mail: zhaofy@ciac.jl.cn; Fax: +86-431-85262410; Tel: +86-431-85262410

<sup>d</sup> University of the Chinese Academy of Sciences, Beijing 100049, China

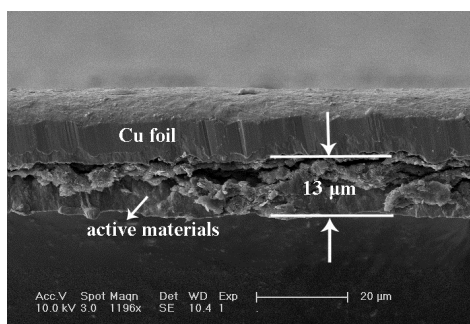

Fig. S1 SEM image of the cross section of an electrode

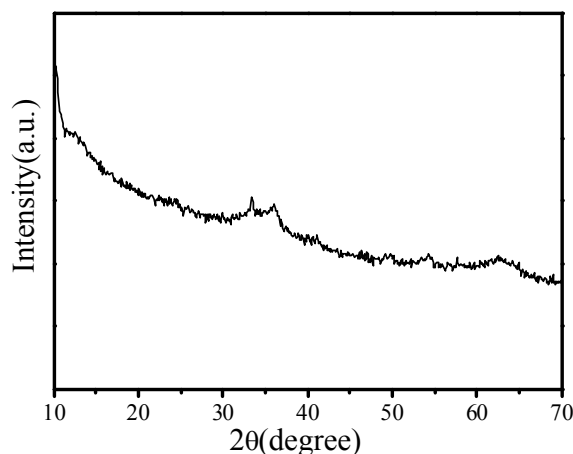

Fig. S2 XRD patterns of the intermediate of Fe-salt@GO-CE-20 composite.

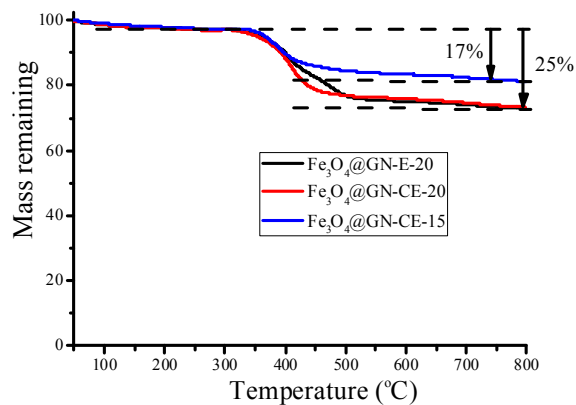

Fig. S3 TGA analysis for the Fe<sub>3</sub>O<sub>4</sub>@GN-E-20, Fe<sub>3</sub>O<sub>4</sub>@GN-CE-20, and Fe<sub>3</sub>O<sub>4</sub>@GN-CE-15.

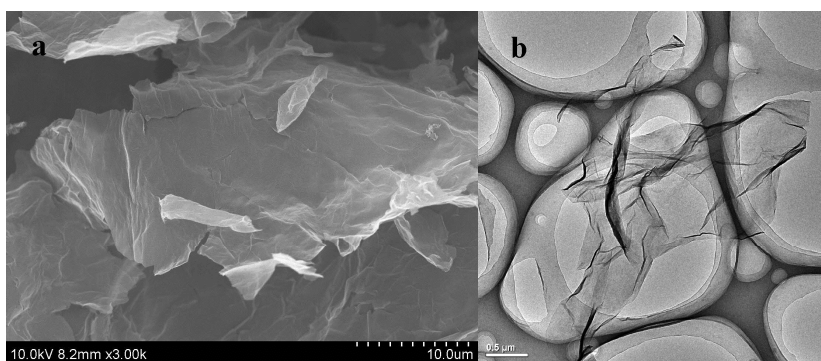

Fig. S4 SEM (a) and TEM (b) images of GO.

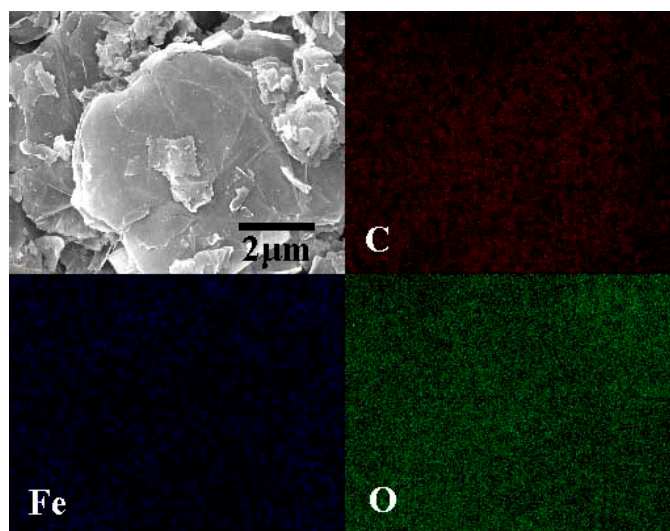

Fig. S5 SEM image and corresponding carbon, iron, and oxygen elemental mapping of Fe<sub>3</sub>O<sub>4</sub>@GN-CE-20 composite synthesized in CO<sub>2</sub>-expanded ethanol.

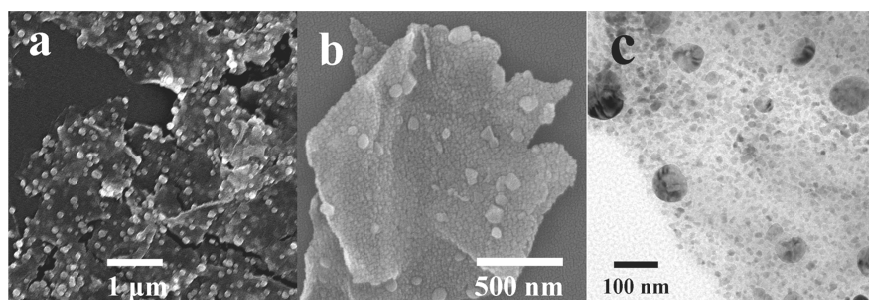

Fig. S6 SEM images of (a) Fe-salt@GO-CE-15. (b) Fe<sub>3</sub>O<sub>4</sub>@GN-CE-15. (c) TEM image of Fe<sub>3</sub>O<sub>4</sub>@GN-CE-15

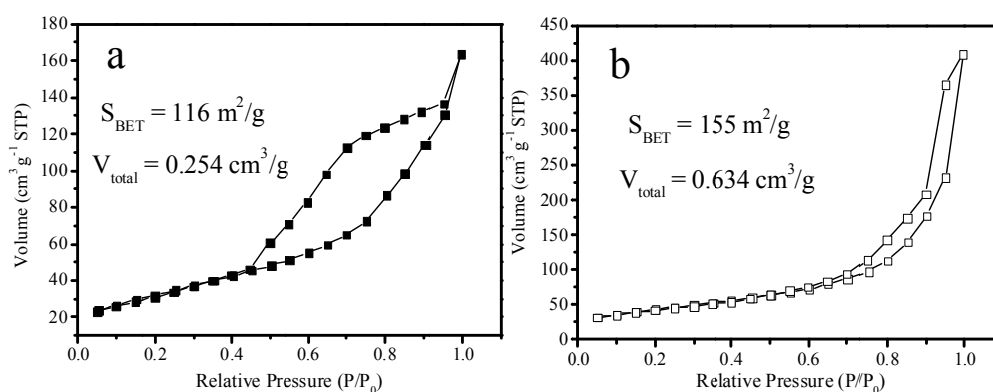

Fig. S7 Nitrogen adsorption/desorption isotherms for (a) Fe<sub>3</sub>O<sub>4</sub>@GN-CE-20, and (b) Fe<sub>3</sub>O<sub>4</sub>@GN-E-20.

**Table S1** A comparison of electrochemical performance of the Fe<sub>3</sub>O<sub>4</sub>@GN-CE-20 with the recent studies on Fe<sub>3</sub>O<sub>4</sub>@graphene composites

| Type of material                         | Initial efficiency | Reversible capacity (mA h g <sup>-1</sup> ) | 0.5 C | 1 C   | 2 C   | 5 C   | Reference |
|------------------------------------------|--------------------|---------------------------------------------|-------|-------|-------|-------|-----------|
| Fe <sub>3</sub> O <sub>4</sub> -rGO      | 65 %               | 993 (50 mA h g <sup>-1</sup> )              | 647   | 396   | 193   | -     | 1         |
| Fe <sub>3</sub> O <sub>4</sub> -GNS      | 61.5 %             | 664 (100 mA h g <sup>-1</sup> )             | -     | -     | -     | -     | 2         |
| Fe <sub>3</sub> O <sub>4</sub> /graphene | 50 %               | 1160 (200 mA h g <sup>-1</sup> )            | -     | -     | -     | -     | 3         |
| GN-Fe <sub>3</sub> O <sub>4</sub>        | 65.6 %             | 1073 (100 mA h g <sup>-1</sup> )            | -     | -     | -     | -     | 4         |
| Fe <sub>3</sub> O <sub>4</sub> /GNSs-1   | 55 %               | 612.5 (92.5 mA h g <sup>-1</sup> )          | -     | -     | -     | -     | 5         |
| FGCs                                     | -                  | 755.6 (1A h g <sup>-1</sup> )               | -     | 755.6 | -     | -     | 6         |
| GCF                                      | -                  | 842.7 (200 mA h g <sup>-1</sup> )           | ~ 700 | ~ 600 | ~ 400 | ~ 200 | 7         |
| RGO-Fe <sub>3</sub> O <sub>4</sub>       | 71 %               | 877 (46.3 mA h g <sup>-1</sup> )            | 736   | 703   | -     | 607   | 8         |
| G-HM                                     | -                  | 900 (100 mA h g <sup>-1</sup> )             | -     | -     | -     | -     | 9         |

|                                          |        |                                  |       |       |       |       |           |
|------------------------------------------|--------|----------------------------------|-------|-------|-------|-------|-----------|
| Fe <sub>3</sub> O <sub>4</sub> -graphene | 70 %   | 1280 (100 mA h g <sup>-1</sup> ) | 1080  | 1010  | 940   |       | 10        |
| GNS/Fe <sub>3</sub> O <sub>4</sub>       | -      | 900 (35 mA h g <sup>-1</sup> )   | -     | -     | -     | -     | 11        |
| Fe <sub>3</sub> O <sub>4</sub> @GN-CE-20 | 73.5 % | 941 (100 mA h g <sup>-1</sup> )  | ~ 930 | ~ 850 | ~ 730 | ~ 460 | This work |

(Note, in this table, 1c = 1000 mA g<sup>-1</sup>)

1. Y. Chen, B. H. Song, X. S. Tang, L. Lu and J. M. Xue, *J. Mater. Chem.*, 2012, **22**, 17656-17662.
2. J. Z. Wang, C. Zhong, D. Wexler, N. H. Idris, Z. X. Wang, L. Q. Chen and H. K. Liu, *Chem. Eur. J.*, 2011, **17**, 661-667.
3. G. Wang, T. Liu, X. Xie, Z. Ren, J. Bai and H. Wang, *Mater. Chem. Phys.*, 2011, **128**, 336-340.
4. J. Su, M. Cao, L. Ren and C. Hu, *J. Phys. Chem. C*, 2011, **115**, 14469-14477.
5. X. Y. Li, X. L. Huang, D. P. Liu, X. Wang, S. Y. Song, L. Zhou and H. J. Zhang, *J. Phys. Chem. C*, 2011, **115**, 21567-21573.
6. B. J. Li, H. Q. Cao, J. Shao, M. Z. Qu and J. H. Warner, *J. Mater. Chem.*, 2011, **21**, 5069-5075.
7. B. J. Li, H. Q. Cao, J. Shao and M. Z. Qu, *Chem. Commun.*, 2011, **47**, 10374-10376.
8. L. W. Ji, Z. K. Tan, T. R. Kuykendall, S. Aloni, S. D. Xun, E. Lin, V. Battaglia and Y. G. Zhang, *Phys. Chem. Chem. Phys.*, 2011, **13**, 7170-7177.
9. D. Y. Chen, G. Ji, Y. Ma, J. Y. Lee and J. M. Lu, *Acs Appl. Mater. Interfaces*, 2011, **3**, 3078-3083.
10. S. K. Behera, *Chem. Commun.*, 2011, **47**, 10371-10373.
11. G. M. Zhou, D. W. Wang, F. Li, L. L. Zhang, N. Li, Z. S. Wu, L. Wen, G. Q. Lu and H. M. Cheng, *Chem. Mater.*, 2010, **22**, 5306-5313.
